# Supplementary material
Source: publisher site journal article supplement (https://www.dovepress.com/article/251174)
Supplement: Supplementary file 1 [file get_supplementary_file.php]

**Table S1:** the details representing FTIR data of *T.brevifolia*dried leaf extract and silver NPs.

| Pos.[°2Th.] | Height [cts] | FWHMLeft[°2Th.] | d-spacing [Å] | Rel. Int. [%] |
| --- | --- | --- | --- | --- |
| 27.95 | 148 | 0.49 | 3.18942 | 28.87 |
| 32.332 | 318 | 0.49 | 2.76664 | 61.82 |
| 38.257 | 514 | 1.13 | 2.35070 | 100.00 |
| 44.16 | 97 | 2.2 | 2.04942 | 18.83 |
| 46.35 | 152 | 0.56 | 1.95753 | 29.59 |
| 54.86 | 58 | 0.8 | 1.67228 | 11.36 |
| 56.70 | 22 | 0.1 | 1.62214 | 4.21 |
| 57.59 | 43 | 0.6 | 1.59912 | 8.44 |
| 64.53 | 153 | 0.75 | 1.44289 | 29.82 |
| 77.34 | 175 | 1.31 | 1.23281 | 33.96 |

**Table S2:** Results of MIC of *T.brevifolia*extract, silver nitrate, and silver NPs

| Organism | Sample | MIC value |
| --- | --- | --- |
| P. aeruginosa | Silver nanoparticle Synthesized with *T.brevifolia*extract | 1.6 mM |
| Silver nitrate | 1.5 mM |
| *T.brevifolia*extract | --- (2g/10ml) |
| E. coli | Silver nanoparticle Synthesized with *T.brevifolia*extract | 1.67 mM |
| Silver nitrate | 1.5 mM |
| *T.brevifolia*extract | --- (2g/10ml) |
| Staph. aureus | Silver nanoparticle Synthesized with *T.brevifolia*extract | 6.6 mM |
| Silver nitrate | 6.2 mM |
| *T.brevifolia*extract | --- (2g/10ml) |

**Table S3:** Breast cell proliferation inhibitory activity of *T.brevifolia*extract, silver nitrate, and silver NPs

| MTT    solutions | No. | Concentration of silver nitrate (µg/ml) | Dilutions | %Cell viability | %Cell inhibition |
| --- | --- | --- | --- | --- | --- |
| Silver NPs  synthesized by  *T.brevifolia*extract | 1 | 0.75 | 1/64 | 68.13 | 31.87 |
| 2 | 1.5 | 1/32 | 56.33 | 43.67 |
| 3 | 3.1 | 1/16 | 35.27 | 64.73 |
| 4 | 6.25 | 1/8 | 26.6 | 73.4 |
| 5 | 12.5 | 1/4 | 25.44 | 74.56 |
| 6 | 25 | 1/2 | 22.9 | 77.1 |
| 7 | 50 | 1/1 | 24.86 | 75.14 |
| Silver nitrate | 1 | 0.75 | 1/64 | 18.77 | 81.23 |
| 2 | 1.5 | 1/32 | 18.2 | 81.8 |
| 3 | 3.1 | 1/16 | 17.63 | 82.37 |
| 4 | 6.25 | 1/8 | 15.79 | 84.21 |
| 5 | 12.5 | 1/4 | 15.5 | 84.5 |
| 6 | 25 | 1/2 | 15.22 | 84.78 |
| 7 | 50 | 1/1 | 14.22 | 85.78 |
| *T.brevifolia*extract | 1 |  | 1/64 | 64.15 | 35.85 |
| 2 |  | 1/32 | 51.63 | 48.37 |
| 3 |  | 1/16 | 49.92 | 50.08 |
| 4 |  | 1/8 | 29.01 | 70.99 |
| 5 |  | 1/4 | 27.88 | 72.12 |
| 6 |  | 1/2 | 28.16 | 71.84 |
| 7 |  | 1/1 | 28.45 | 71.55 |

**Table S4.** Application of Green method produced silver nanoparticles:

| **Authors** | **Plant name** | **Size (nm)** | **application** | **Year** | **reference** |
| --- | --- | --- | --- | --- | --- |
| K.Ramachandran and *et al* | Piper betle biomass | 20-83 | catalytic activity toward sensitive and selective nitrite detection | 2015 | 29 |
| N. Ahmad and *et al* | Weed | 5–20 | antimicrobial activity against common pathogens | 2010 | 30 |
| Mariselvam R | extract of the inflorescence of Cocos nucifera | 22 | antimicrobial activity | 2014 | 31 |
| V.Dhand | Coffea arabica seed extract | 20-30 | antimicrobial activity | 2015 | 14 |
| Nabikhan A | callus and leaf extracts from saltmarsh plant, Sesuvium portulacastrum L. | 5 -20 | antimicrobial activity | 2010 | 7 |
| R. Sithara | leaf extract of *Acalypha hispida* | 20–50 | in the detection of Mn(II) ions | 2017 | 32 |
| Alt V. and et al | (in vitro assessment) | - | antibacterial properties and cytotoxicity of nanoparticulate silver bone cement | 2004 | 33 |
| Jain P, Pradeep T | (in vitro assessment) | - | Water purification: as an antibacterial water filter | 2005 | 34 |
| Premkumar T | - | - | Tumor: MCF-7 and NCI-H358 cancer cells | 2010 | 35 |
| Haes AJ | - | 100 -50 | Biosensors | 2002 | 36 |
| S. Sarli | *Taxus-brevifolia* tree leaves | 7-15 | Antibacterial and anticancer effect | 2020 | This report |
